# Supplementary material for: Optochemokine Tandem for Light-Control of Intracellular Ca2+
Source: PubMed Central journal article supplement (PMC5074463; doi:10.1371/journal.pone.0165344), 2016-10-21

**AMD3100**  
**10  $\mu$ M**

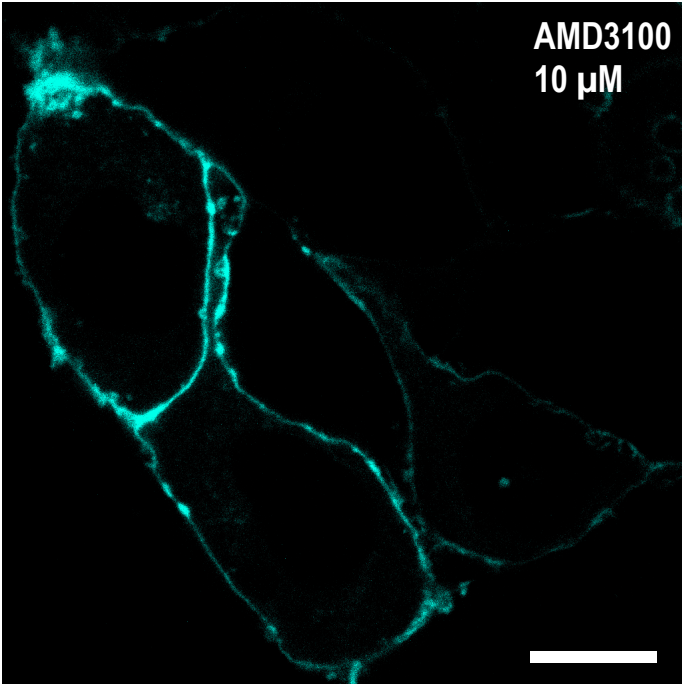

**SDF1 $\alpha$**   
**50 nM**

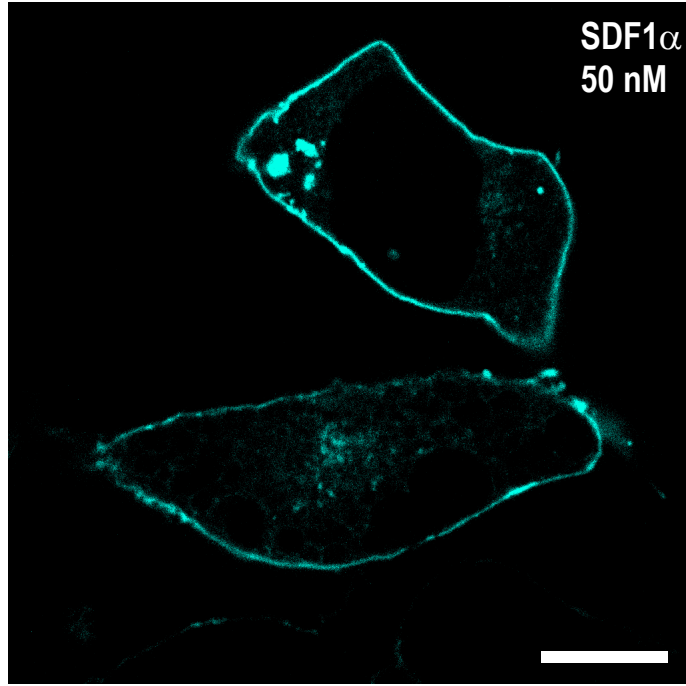

Supplement: pone.0165344.s003.pdf [file pone.0165344.s003.pdf]
