# Supplementary material for: Optochemokine Tandem for Light-Control of Intracellular Ca2+
Source: PubMed Central journal article supplement (PMC5074463; doi:10.1371/journal.pone.0165344), 2016-10-21

kDa

140  
115  
80  
65  
50  
40  
30  
25

CXCR4-YFP

tCXCR4/CatCh

Control

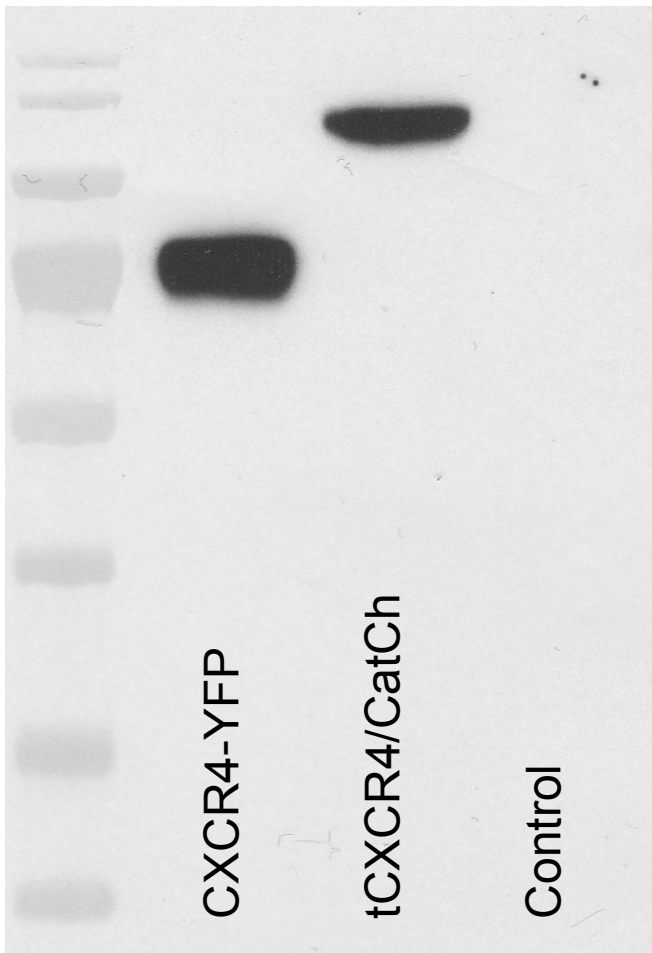

Supplement: pone.0165344.s006.pdf [file pone.0165344.s006.pdf]
