# Supplementary material for: Optochemokine Tandem for Light-Control of Intracellular Ca2+
Source: PubMed Central journal article supplement (PMC5074463; doi:10.1371/journal.pone.0165344), 2016-10-21

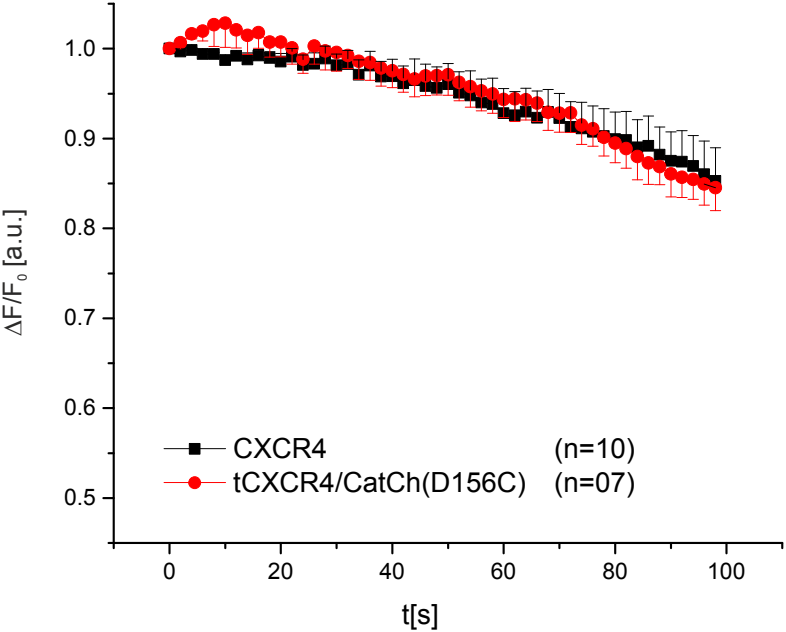

Supplement: pone.0165344.s010.pdf [file pone.0165344.s010.pdf]
